# Supplementary material for: A Förster Resonance Energy Transfer (FRET)-Based Immune Assay for the Detection of Microcystin-LR in Drinking Water
Source: MDPI journal article supplement (doi:10.3390/s24103204), 2024-05-17
Supplement: s1 [file s1]

Article

# A Förster Resonance Energy Transfer (FRET)-Based Immune Assay for the Detection of Microcystin-LR in Drinking Water

Alessandro Capo <sup>1</sup>, Angela Pennacchio <sup>2</sup>, Concetta Montagnese <sup>2</sup>, Antonis Hadjiantonis <sup>3</sup>, Panayiota Demosthenous <sup>3</sup>, Alessandro Giusti <sup>3</sup>, Maria Staiano <sup>2</sup>, Sabato D'Auria <sup>4,\*</sup> and Antonio Varriale <sup>1</sup>

<sup>1</sup> Istituto di Scienze dell'Alimentazione, CNR, URT-Napoli, 80100 Napoli, Italy; alessandro.capo@cnr.it (A.C.); antonio.varriale@cnr.it (A.V.)

<sup>2</sup> Istituto di Scienze dell'Alimentazione, CNR, 83100 Avellino, Italy; angela.pennacchio@cnr.it (A.P.); concetta.montagnese@cnr.it (C.M.); maria.staiano@cnr.it (M.S.)

<sup>3</sup> CY.R.I.C Cyprus Research and Innovation Center Ltd., Egomi, 2414 Nicosia, Cyprus; antonish@cyric.eu (A.H.); p.demosthenous@cyric.eu (P.D.); alessandro@cyric.eu (A.G.)

<sup>4</sup> Dipartimento di Scienze Bio-Agroalimentari, CNR, 00185 Roma, Italy

\* Correspondence: sabato.dauria@cnr.it

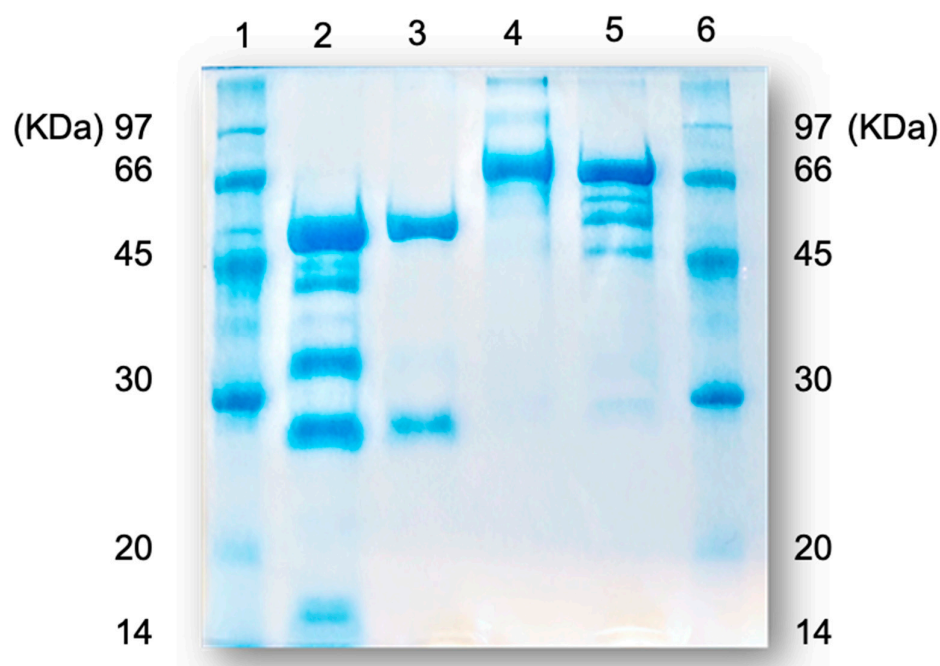

**Figure S1:** SDS-PAGE analysis: 15% acrylamide SDS-PAGE standard molecular weight markers (line 1 and line 6); anti-MC-LR (line 2); anti-MC-LR 568 (line 3); MC-LR BSA 647 (line 4); MC-LR BSA (line 5).

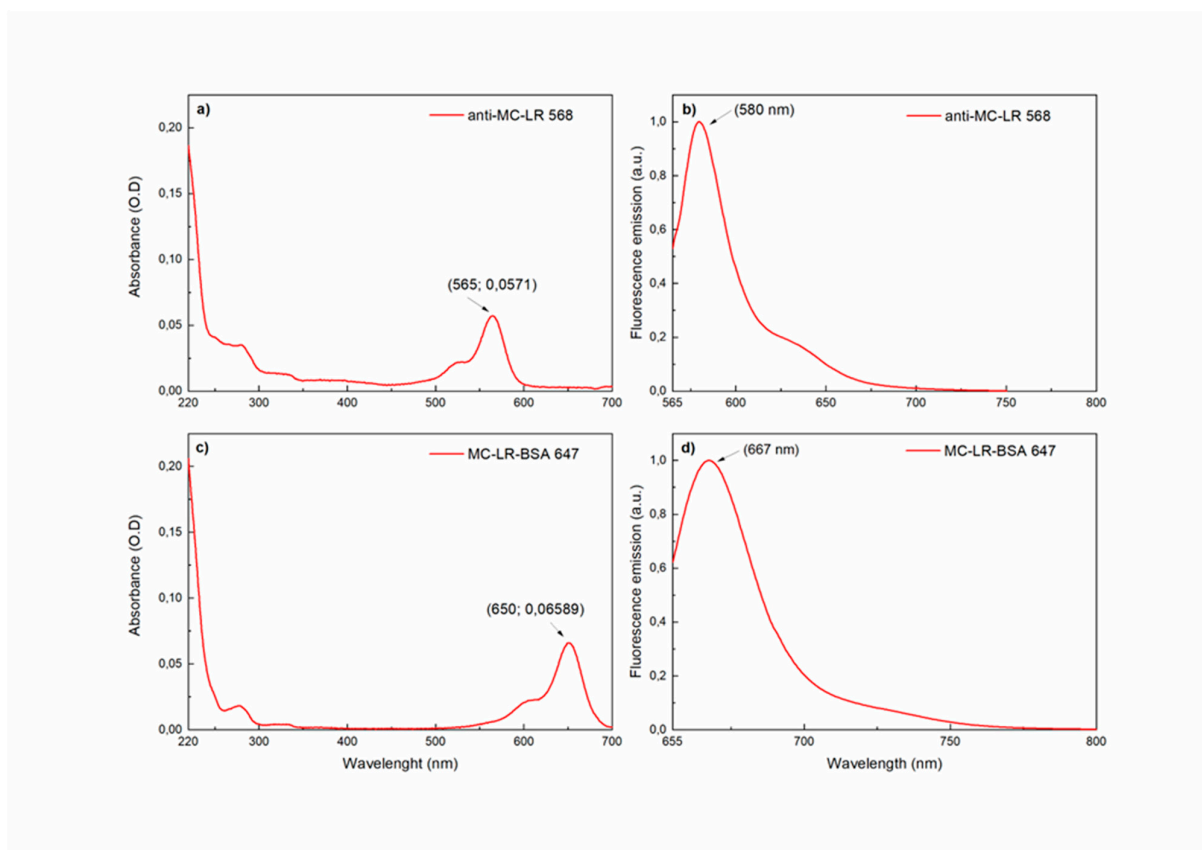

**Figure S2:** Spectroscopic characterization of anti-MC-LR 568 and MC-LR BSA 647: (a) absorption spectrum of anti-MC-LR 568; (b) fluorescence emission spectrum of anti-MC-LR 568 acquired upon excitation at 565 nm (temperature was set at 25°C); (c) absorption spectrum of MC-LR-BSA 647; d) fluorescence emission spectrum of MC-LR-BSA 647 acquired upon excitation at 650 nm (temperature was set at 25°C).
